# Supplementary material
Source: PubMed Central journal article supplement (PMC4727424)

### Figure Supplementary 1.

**Panel A.** Luminescence interaction quantification assays were performed with the mammalian CheckMate system (Promega) in HeLa cells, and the firefly luciferase/renilla luciferase (F/R) signals ratio is shown. Compared to full-length NMT2, truncation of the C-terminal domain eliminated interaction with ACBD6. Association with ZNF23 protein, previously identified in a yeast two-hybrid screen (62), could not be confirmed in mammalian cells. Error bars represent the standard deviations of three measurements.

**Panel B.** Expression of ecNMT2 in *E. coli* is low (left gel) and a significant amount of the protein was lost in the insoluble fraction, even in presence of 0.1% Triton X-100 (middle panel). The protein was purified by metal-affinity chromatography (right panel).

**Panel C.** Real-time colorimetric measurements of the activity of purified NMT2 protein. Shown are examples of the trace of absorbance at 412nm obtained in presence of 50 $\mu$ M C14-CoA and 2 $\mu$ M ecNMT2 in the absence or presence of 100 $\mu$ M of the target peptide. The effect of temperature on the reaction is shown in the inset.

**Panel D.** Examples of traces obtained in the presence of various concentrations of peptide (10-50-100 $\mu$ M), and of C14-CoA (5-50 $\mu$ M) and of ecNMT2 (1x and 2x) as function of time are shown.

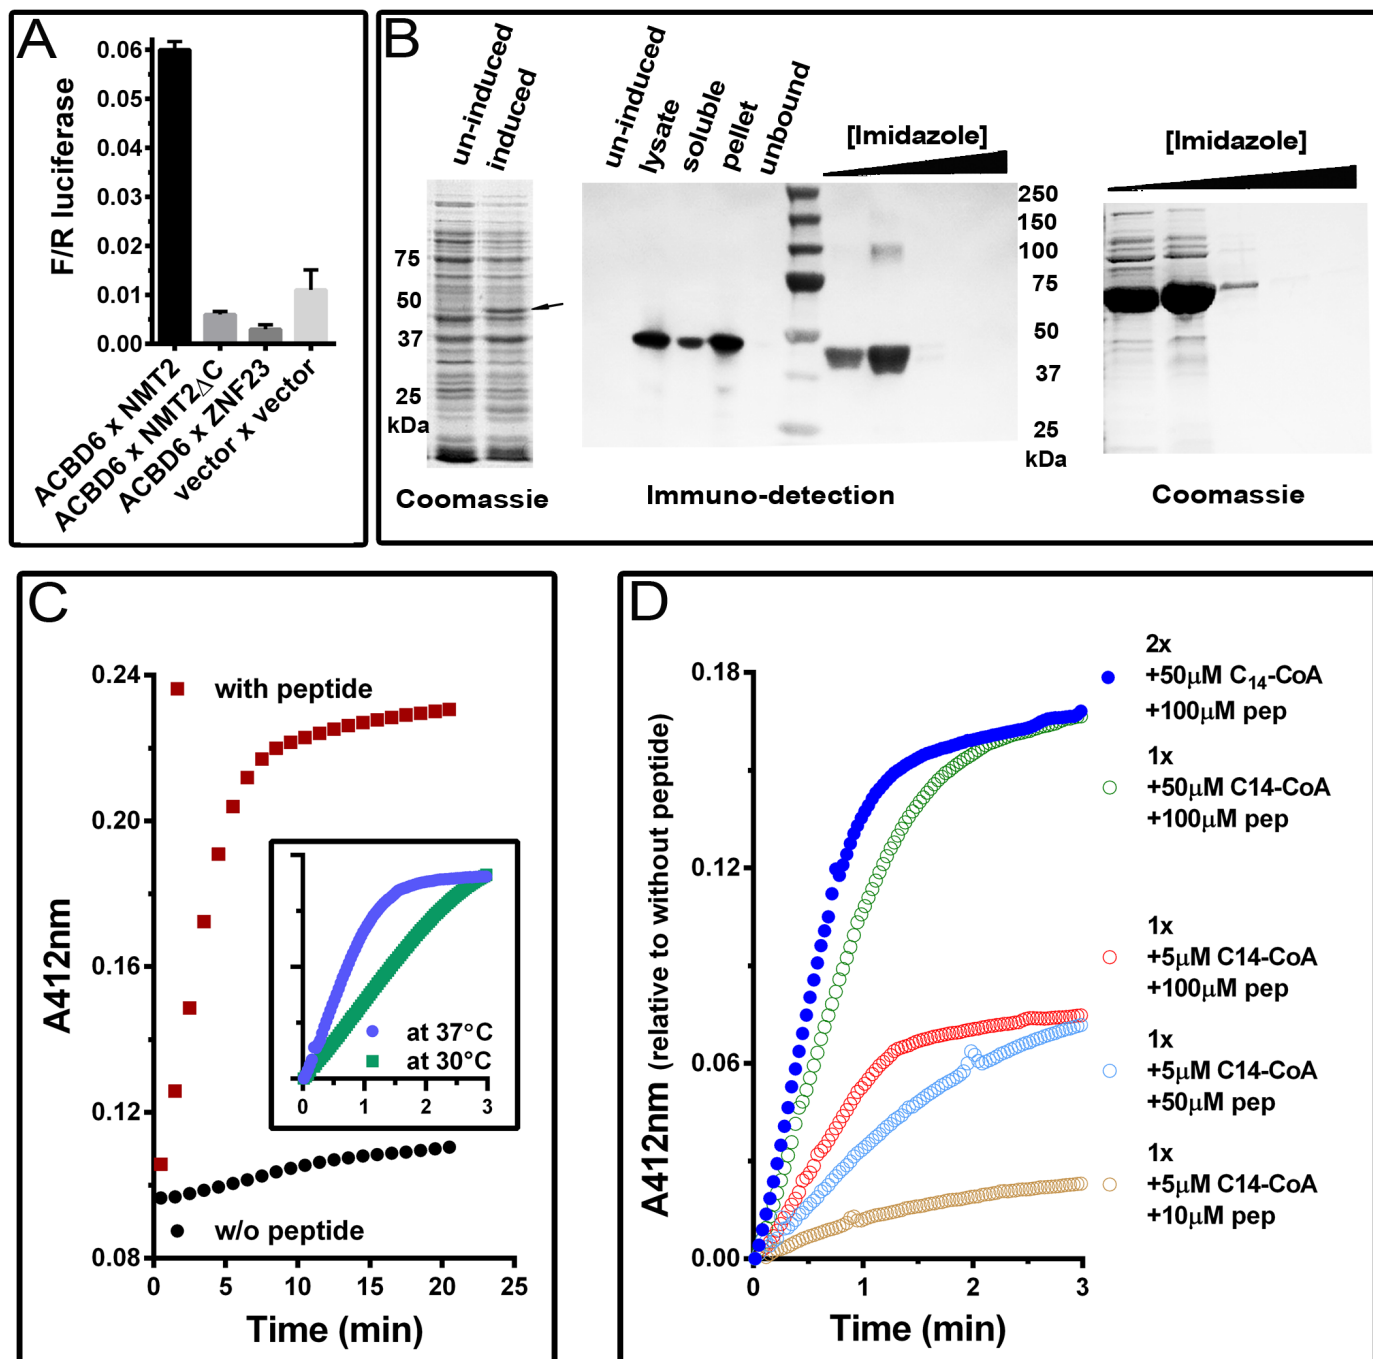

Supplement: 10.1194_M065003_jlr.M065003-1.pdf [file 10.1194_M065003_jlr.M065003-1.pdf]
